# Supplementary material for: iPSC-derived exosomes promote angiogenesis in naturally aged mice
Source: publisher site journal article supplement (doi:10.18632/aging.204845), 2023-06-26
Supplement: Supplementary file [file aging-v15i12-204845-supplementary-material-SD1.pdf]

SUPPLEMENTARY FIGURE

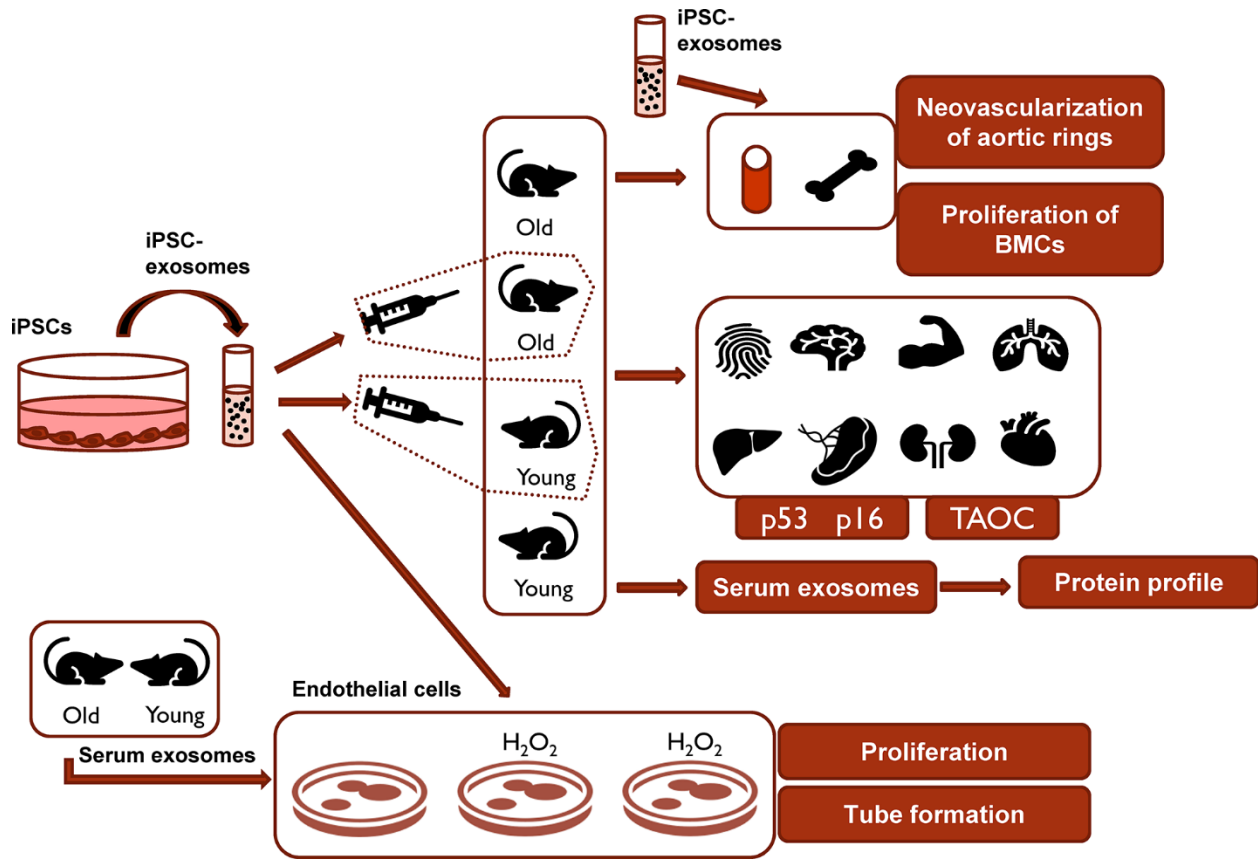

**Supplementary Figure 1. Experimental approach.** Both *in vitro* culture and *in vivo* pre-injection of iPSC-derived exosomes can restore dysfunctional endothelium. iPSC-derived exosomes can promote angiogenesis, promote the proliferation of BMCs, reduce the expression of p53 and p16, and improve tissue antioxidant capacity in some organs of aging mice. Moreover, iPSC-derived exosomes can repair damaged endothelial function, and improve endothelial cell angiogenesis.
